# Supplementary material for: Endocannabinoid and Nitric Oxide-Dependent IGF-I-Mediated Synaptic Plasticity at Mice Barrel Cortex
Source: MDPI journal article supplement (doi:10.3390/cells11101641), 2022-05-14
Supplement: s1 [file s1]

Article

# Endocannabinoid and Nitric Oxide-Dependent IGF-I-Mediated Synaptic Plasticity at Mice Barrel Cortex

José Antonio Noriega-Prieto <sup>1,2</sup>, Laura Eva Maglio <sup>1</sup>, Sara Ibáñez-Santana <sup>1</sup> and David Fernández de Sevilla <sup>1,\*</sup>

<sup>1</sup> Departamento de Anatomía, Histología y Neurociencia, Facultad de Medicina, Universidad Autónoma de Madrid, 28029 Madrid, Spain; norie015@umn.edu (J.A.N.-P.); lauemaglio@gmail.com (L.E.M.); sara.ibannezs@estudiante.uam.es (S.I.-S.)

<sup>2</sup> Department of Neuroscience, University of Minnesota, Minneapolis, NM 55455, USA

\* Correspondence: david.fernandezdesevilla@uam.es

## Supplementary Materials:

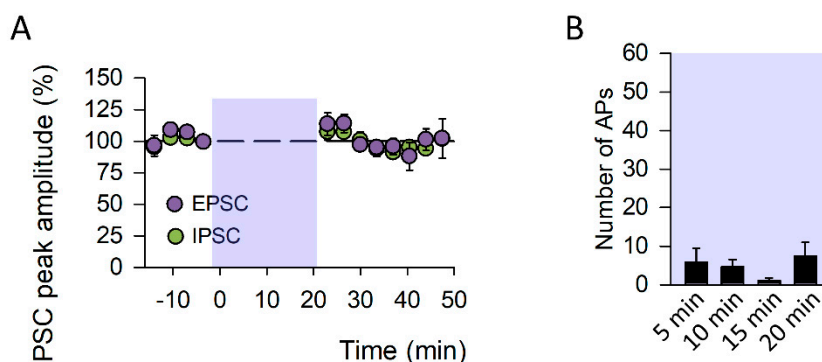

**Figure S1.** The protocol of stimulation does not induce plasticity. **A)** Plot showing a long-lasting stable recording of EPSCs (blue circles;  $n=5$ ,  $p=0.83$ ) and IPSCs (green circles;  $n=5$ ,  $p=0.23$ ) using the same protocol as in figure 1a, but in the absence of IGF-I. **B)** Number of action potentials recorded at different time points (5,10,15 and 20 min), showing the lack of effect of the protocol used ( $n=5$ ,  $p=0.502$ ).

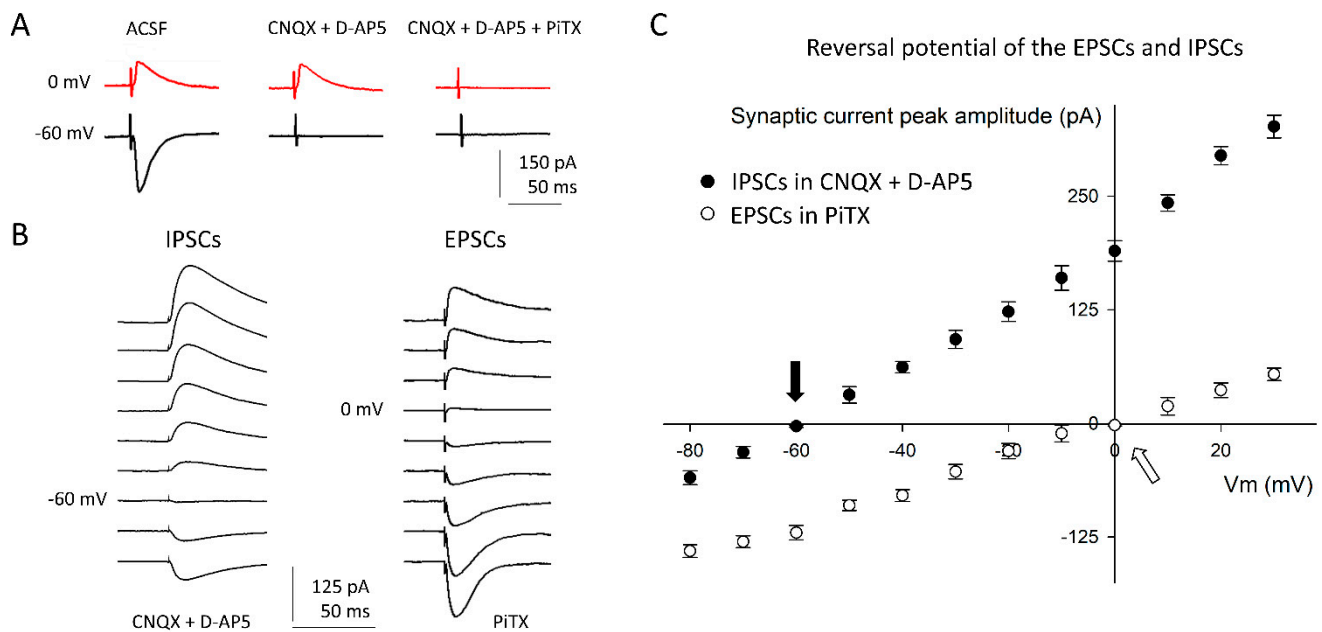

**Figure S2.** Reversal potential of the EPSCs and IPSCs. **A)** Representative synaptic currents recorded at 0 mV (top red recordings) and at -60 mV (bottom black recordings) in ACSF (left), in CNQX + D-AP5 (middle) and in CNQX + D-AP5 + PiTX (right). Note that the synaptic currents recorded at -60 mV are totally abolished under CNQX + D-AP5 indicating that are glutamatergic, being unaffected these recorded at 0 mV that are blocked with PiTX suggesting that are GABAergic ones. **B)** Representative IPSCs and EPSCs recorded in CNQX + D-AP5 (left) and in PiTX (right), respectively, while holding the membrane potential in steps of 10 mV. Note that -60 mV is the IPSC reversal potential whereas the EPSC reversal potential is 0 mV. **C,** Plot of the synaptic current peak amplitude measured at 10 mV steps from -80 mV to +30 mV in CNQX + D-AP5 (IPSCs, black circles) and in PiTX (EPSCs, white circles). Black arrow point to the IPSC reversal potential ( $-61.6 \pm 1.7$  mV,  $n=6$ ) and white arrow point to the EPSC reversal potential ( $0 \pm 2.6$  mV,  $n=6$ ).
